# Supplementary material for: Reduced graphene oxide–copper thiotungstate composite for enhanced photoelectrochemical performance
Source: Royal Society of Chemistry journal article supplement (doi:10.1039/d3nj01619f), 2023-01-01
Supplement: d3nj01619f1.pdf [file d3nj01619f1.pdf]

## Supplementary Information

### Reduced graphene oxide–Copper thiotungstate Composite for Enhanced Photoelectrochemical Performance

Preeti Dagar<sup>a</sup>, and Ashok K. Ganguli<sup>b,c\*</sup>

<sup>a</sup>*Institute of Nano Science and Technology, Knowledge City, Sector 81, SAS Nagar, Punjab-140306, India*

<sup>b</sup>*Department of Chemistry, Indian Institute of Technology Delhi, Hauz Khas, New Delhi 110016, India*

<sup>c</sup>*Department of Materials Science and Engineering, Indian Institute of Technology Delhi, New Delhi-110016, India*

#### 1. Synthesis of rGO

Reduced graphene oxide (rGO) was synthesized using Hummer's method. 2 g of graphite powder was dispersed in a glass bottle containing concentrated H<sub>2</sub>SO<sub>4</sub> and stirred magnetically overnight. The glass bottle was then kept in ice bath and 25 g KMnO<sub>4</sub> was then added to it slowly while stirring. The above mixture was stirred magnetically for about 5 hrs. and then it was added to 500 mL water carefully keeping it in an ice bath followed by the addition of 30 mL H<sub>2</sub>O<sub>2</sub> (30%). The product obtained i.e.; graphite oxide was washed with 20 % HCl for removing metal ions. The exfoliation and reduction of graphite oxide was done by thermally treating it at 1100 °C for 10 min in inert atmosphere. The rGO thus obtained was used further for the synthesis of Cu<sub>2</sub>WS<sub>4</sub>-rGO.

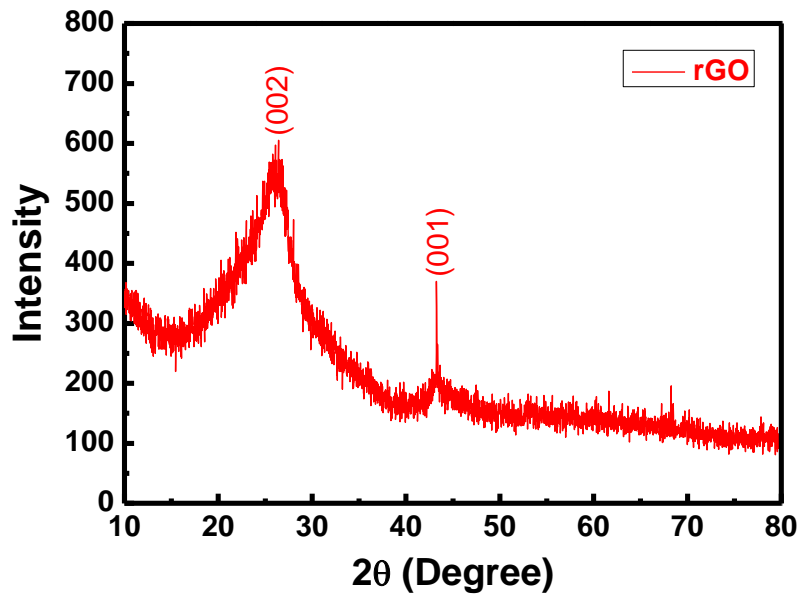

**Fig. S1** Powder X-ray diffraction pattern of rGO.

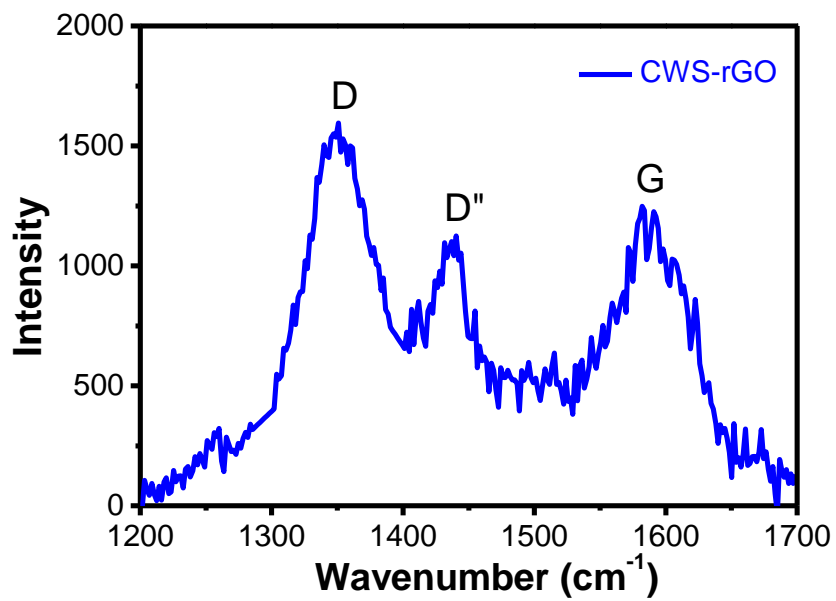

**Fig. S2** Raman spectra of CWS-rGO showing the presence of D, D'' and G bands.

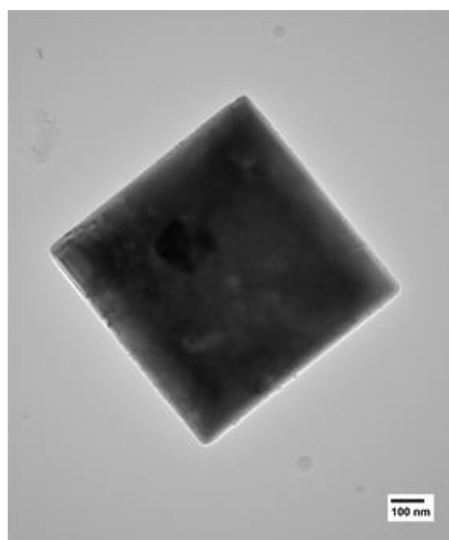

**Fig. S3** Transmission electron microscope (TEM) image of CWS.

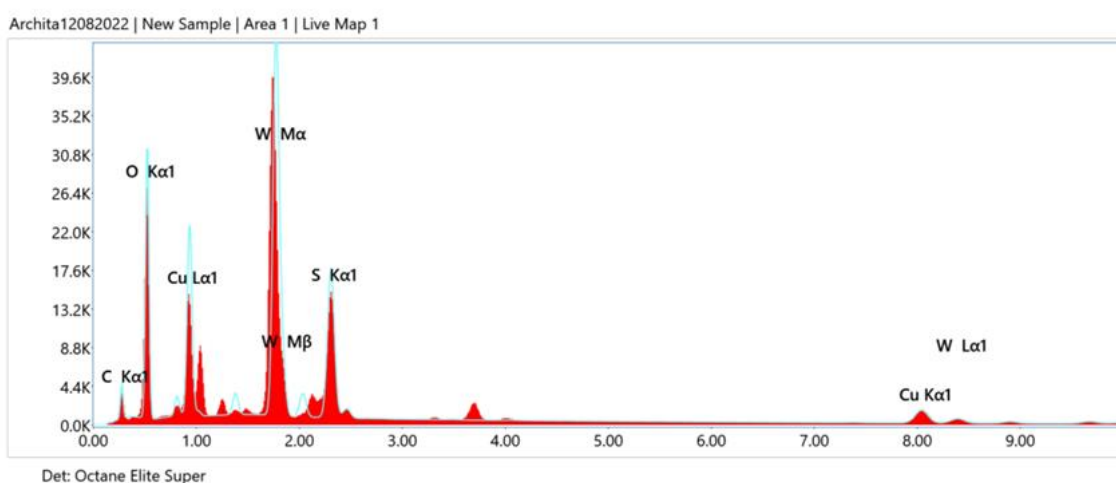

**Fig. S4** Energy dispersive X-ray (EDX) spectra of CWS-rGO.

**Table S1.** Atomic percentage of elements in CWS-rGO using FESEM-EDX

| Element | Atomic % |
|---------|----------|
| C       | 34.8     |
| O       | 46.4     |
| S       | 9.5      |
| Cu      | 6.2      |
| W       | 3.1      |

**Table S2.** Comparison of current density values obtained @ 1.23 V and 1.98 V vs RHE in both dark and illuminated conditions

| Sample  | Current density (mA/cm <sup>2</sup> ) @1.23 V |        | Current density (mA/cm <sup>2</sup> ) @1.98 V |        |
|---------|-----------------------------------------------|--------|-----------------------------------------------|--------|
|         | Dark                                          | Light  | Dark                                          | Light  |
| CWS     | 0.0001                                        | 0.0107 | 0.7792                                        | 1.2347 |
| CWS-rGO | 0.00024                                       | 0.0172 | 1.9982                                        | 3.1771 |

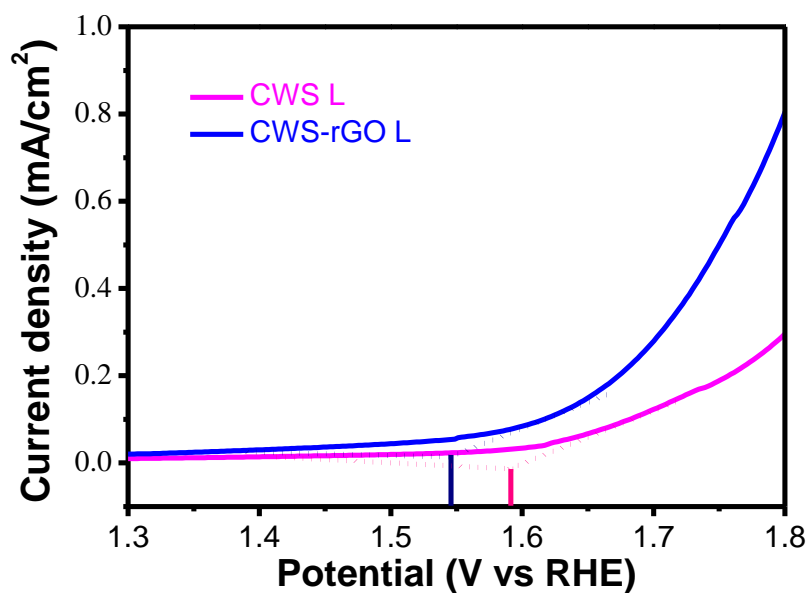

**Fig. S5** Onset potential for CWS and CWS-rGO composite.
